# Supplementary material for: Construction of porous 2D Dy3+ metal organic frameworks: solvent responsive magnetic dynamics under 0 Oe dc field and luminescent sensors for Fe3+ ions
Source: Royal Society of Chemistry journal article supplement (doi:10.1039/d4ce00556b), 2024-01-01
Supplement: d4ce00556b1.pdf [file d4ce00556b1.pdf]

## Construction of porous 2D Dy<sup>3+</sup> metal organic frameworks: Solvent responsive magnetic dynamics under 0 Oe dc field and luminescent sensor for Fe<sup>3+</sup> ion

Yangyang Gou,<sup>#a</sup> Ming Gao,<sup>#a</sup> Yunlong Wu,<sup>c</sup> Wei Zhou,<sup>a</sup> Jiancheng Feng,<sup>a</sup> Sheng Zhang,<sup>\*a</sup> Xiaohong Wang,<sup>\*</sup> Bing Yin<sup>\*b</sup>

### AUTHOR ADDRESS

---

*<sup>a</sup>College of Chemistry and Chemical Engineering, Hainan University, Haikou 570228, China*

*<sup>b</sup>Lab of Theoretical Molecular Magnetism, College of Chemistry and Materials Science, Northwest University, Xi'an, 710127 P. R. China*

*<sup>c</sup>School of Materials Science & Engineering, Xi'an Polytechnic University, Xi'an 710048, P. R. China*

---

*#These authors contributed equally to the work*

\*E-mail: zhangsheng19890501@163.com. (S. Zhang)

\*E-mail: wangxiaohong@hainanu.edu.cn

\*E-mail: rayinyin@nwu.edu.cn. (B. Yin)

Table S1 Bond Lengths for 1.

| Atom | Atom             | Length/Å   |
|------|------------------|------------|
| Dy1  | O24              | 2.258(2)   |
| Dy1  | O22 <sup>1</sup> | 2.262(2)   |
| Dy1  | O2               | 2.2765(19) |
| Dy1  | O9               | 2.3056(18) |
| Dy1  | O13              | 2.3099(18) |
| Dy1  | O5               | 2.362(2)   |
| Dy1  | O25              | 2.489(2)   |
| Dy2  | O14              | 2.249(2)   |
| Dy2  | O16 <sup>2</sup> | 2.254(2)   |
| Dy2  | O10              | 2.2839(19) |
| Dy2  | O11 <sup>3</sup> | 2.2882(19) |
| Dy2  | O17 <sup>2</sup> | 2.3499(18) |
| Dy2  | O26              | 2.404(2)   |
| Dy2  | O1W              | 2.410(2)   |
| Dy2  | O25              | 2.873(2)   |
| Dy3  | O8               | 2.2515(19) |
| Dy3  | O6 <sup>4</sup>  | 2.270(2)   |
| Dy3  | O21              | 2.277(2)   |
| Dy3  | O2W              | 2.328(2)   |
| Dy3  | O1 <sup>4</sup>  | 2.3340(19) |
| Dy3  | O27              | 2.341(2)   |
| Dy3  | O23 <sup>4</sup> | 2.3723(19) |
| Dy4  | O7               | 2.2817(18) |
| Dy4  | O12 <sup>5</sup> | 2.3025(19) |
| Dy4  | O18              | 2.3101(18) |
| Dy4  | O4 <sup>5</sup>  | 2.367(2)   |
| Dy4  | O15              | 2.368(2)   |
| Dy4  | O19 <sup>2</sup> | 2.454(2)   |
| Dy4  | O20 <sup>2</sup> | 2.4908(18) |
| Dy4  | O3 <sup>5</sup>  | 2.667(2)   |

<sup>1</sup>+X,3/2-Y,1/2+Z; <sup>2</sup>+X,1/2-Y,1/2+Z; <sup>3</sup>+X,1/2-Y,-1/2+Z; <sup>4</sup>+X,3/2-Y,-1/2+Z; <sup>5</sup>+X,+Y,-1+Z

Table S2 Bond Lengths for 2.

| Atom | Atom            | Length/Å |
|------|-----------------|----------|
| Dy1  | O2              | 2.237(5) |
| Dy1  | O6 <sup>1</sup> | 2.287(5) |
| Dy1  | O4 <sup>2</sup> | 2.321(4) |

|     |                  |          |
|-----|------------------|----------|
| Dy1 | O9               | 2.324(4) |
| Dy1 | O12 <sup>3</sup> | 2.332(4) |
| Dy1 | O8 <sup>4</sup>  | 2.335(4) |
| Dy1 | O13              | 2.351(6) |
| Dy2 | O5               | 2.259(5) |
| Dy2 | O10              | 2.274(4) |
| Dy2 | O3 <sup>2</sup>  | 2.282(5) |
| Dy2 | O1               | 2.293(4) |
| Dy2 | O7 <sup>5</sup>  | 2.315(5) |
| Dy2 | O11 <sup>4</sup> | 2.396(4) |
| Dy2 | O14              | 2.507(9) |
| Dy2 | O12 <sup>4</sup> | 2.643(4) |

<sup>1</sup>3/2-X,-1/2+Y,3/2-Z; <sup>2</sup>-1/2+X,1/2-Y,-1/2+Z; <sup>3</sup>1-X,-Y,1-Z; <sup>4</sup>1/2+X,1/2-Y,1/2+Z; <sup>5</sup>1-X,1-Y,1-Z

Table S3 Bond Angles for **1**.

| Atom             | Atom | Atom             | Angle/°    |
|------------------|------|------------------|------------|
| O24              | Dy1  | O22 <sup>1</sup> | 73.40(10)  |
| O24              | Dy1  | O2               | 127.97(8)  |
| O22 <sup>1</sup> | Dy1  | O2               | 78.57(10)  |
| O24              | Dy1  | O9               | 127.31(9)  |
| O22 <sup>1</sup> | Dy1  | O9               | 80.16(9)   |
| O2               | Dy1  | O9               | 88.47(8)   |
| O24              | Dy1  | O13              | 75.06(8)   |
| O22 <sup>1</sup> | Dy1  | O13              | 121.62(10) |
| O2               | Dy1  | O13              | 155.15(8)  |
| O9               | Dy1  | O13              | 81.76(7)   |
| O24              | Dy1  | O5               | 79.57(9)   |
| O22 <sup>1</sup> | Dy1  | O5               | 132.77(9)  |
| O2               | Dy1  | O5               | 89.04(9)   |
| O9               | Dy1  | O5               | 145.52(7)  |
| O13              | Dy1  | O5               | 86.32(8)   |
| O24              | Dy1  | O25              | 143.73(9)  |
| O22 <sup>1</sup> | Dy1  | O25              | 142.08(9)  |
| O2               | Dy1  | O25              | 70.24(9)   |
| O9               | Dy1  | O25              | 78.01(7)   |
| O13              | Dy1  | O25              | 85.35(8)   |
| O5               | Dy1  | O25              | 68.82(8)   |
| O14              | Dy2  | O16 <sup>2</sup> | 151.77(9)  |
| O14              | Dy2  | O10              | 91.55(8)   |

|                  |     |                  |            |
|------------------|-----|------------------|------------|
| O16 <sup>2</sup> | Dy2 | O10              | 99.37(8)   |
| O14              | Dy2 | O11 <sup>3</sup> | 81.13(8)   |
| O16 <sup>2</sup> | Dy2 | O11 <sup>3</sup> | 77.43(9)   |
| O10              | Dy2 | O11 <sup>3</sup> | 153.20(8)  |
| O14              | Dy2 | O17 <sup>2</sup> | 76.53(8)   |
| O16 <sup>2</sup> | Dy2 | O17 <sup>2</sup> | 115.89(7)  |
| O10              | Dy2 | O17 <sup>2</sup> | 125.82(8)  |
| O11 <sup>3</sup> | Dy2 | O17 <sup>2</sup> | 77.68(7)   |
| O14              | Dy2 | O26              | 78.39(9)   |
| O16 <sup>2</sup> | Dy2 | O26              | 79.13(9)   |
| O10              | Dy2 | O26              | 76.06(9)   |
| O11 <sup>3</sup> | Dy2 | O26              | 77.22(9)   |
| O17 <sup>2</sup> | Dy2 | O26              | 146.77(9)  |
| O14              | Dy2 | O1W              | 135.15(8)  |
| O16 <sup>2</sup> | Dy2 | O1W              | 73.07(8)   |
| O10              | Dy2 | O1W              | 73.79(8)   |
| O11 <sup>3</sup> | Dy2 | O1W              | 128.57(7)  |
| O17 <sup>2</sup> | Dy2 | O1W              | 78.67(8)   |
| O26              | Dy2 | O1W              | 134.44(9)  |
| O14              | Dy2 | O25              | 64.69(8)   |
| O16 <sup>2</sup> | Dy2 | O25              | 143.47(8)  |
| O10              | Dy2 | O25              | 66.93(7)   |
| O11 <sup>3</sup> | Dy2 | O25              | 129.94(7)  |
| O17 <sup>2</sup> | Dy2 | O25              | 60.14(6)   |
| O26              | Dy2 | O25              | 125.55(8)  |
| O1W              | Dy2 | O25              | 70.59(7)   |
| O8               | Dy3 | O6 <sup>4</sup>  | 157.01(8)  |
| O8               | Dy3 | O21              | 77.65(9)   |
| O6 <sup>4</sup>  | Dy3 | O21              | 117.18(9)  |
| O8               | Dy3 | O2W              | 81.34(8)   |
| O6 <sup>4</sup>  | Dy3 | O2W              | 104.02(9)  |
| O21              | Dy3 | O2W              | 118.19(10) |
| O8               | Dy3 | O1 <sup>4</sup>  | 89.31(7)   |
| O6 <sup>4</sup>  | Dy3 | O1 <sup>4</sup>  | 77.24(8)   |
| O21              | Dy3 | O1 <sup>4</sup>  | 79.47(9)   |
| O2W              | Dy3 | O1 <sup>4</sup>  | 157.20(9)  |
| O8               | Dy3 | O27              | 78.81(9)   |
| O6 <sup>4</sup>  | Dy3 | O27              | 80.24(9)   |
| O21              | Dy3 | O27              | 147.58(10) |

|                  |     |                  |           |
|------------------|-----|------------------|-----------|
| O2W              | Dy3 | O27              | 79.52(10) |
| O1 <sup>4</sup>  | Dy3 | O27              | 78.27(9)  |
| O8               | Dy3 | O23 <sup>4</sup> | 127.40(8) |
| O6 <sup>4</sup>  | Dy3 | O23 <sup>4</sup> | 74.58(8)  |
| O21              | Dy3 | O23 <sup>4</sup> | 79.38(9)  |
| O2W              | Dy3 | O23 <sup>4</sup> | 69.23(8)  |
| O1 <sup>4</sup>  | Dy3 | O23 <sup>4</sup> | 131.44(7) |
| O27              | Dy3 | O23 <sup>4</sup> | 132.97(9) |
| O7               | Dy4 | O12 <sup>5</sup> | 119.69(7) |
| O7               | Dy4 | O18              | 159.00(7) |
| O12 <sup>5</sup> | Dy4 | O18              | 81.00(8)  |
| O7               | Dy4 | O4 <sup>5</sup>  | 94.80(9)  |
| O12 <sup>5</sup> | Dy4 | O4 <sup>5</sup>  | 94.07(9)  |
| O18              | Dy4 | O4 <sup>5</sup>  | 79.10(8)  |
| O7               | Dy4 | O15              | 76.29(8)  |
| O12 <sup>5</sup> | Dy4 | O15              | 77.80(9)  |
| O18              | Dy4 | O15              | 114.44(8) |
| O4 <sup>5</sup>  | Dy4 | O15              | 162.36(9) |
| O7               | Dy4 | O19 <sup>2</sup> | 93.55(7)  |
| O12 <sup>5</sup> | Dy4 | O19 <sup>2</sup> | 128.39(7) |
| O18              | Dy4 | O19 <sup>2</sup> | 73.83(7)  |
| O4 <sup>5</sup>  | Dy4 | O19 <sup>2</sup> | 123.25(7) |
| O15              | Dy4 | O19 <sup>2</sup> | 73.10(8)  |
| O7               | Dy4 | O20 <sup>2</sup> | 76.33(7)  |
| O12 <sup>5</sup> | Dy4 | O20 <sup>2</sup> | 162.11(8) |
| O18              | Dy4 | O20 <sup>2</sup> | 82.68(7)  |
| O4 <sup>5</sup>  | Dy4 | O20 <sup>2</sup> | 75.61(8)  |
| O15              | Dy4 | O20 <sup>2</sup> | 115.96(8) |
| O19 <sup>2</sup> | Dy4 | O20 <sup>2</sup> | 52.41(6)  |
| O7               | Dy4 | O3 <sup>5</sup>  | 71.67(7)  |
| O12 <sup>5</sup> | Dy4 | O3 <sup>5</sup>  | 69.44(7)  |
| O18              | Dy4 | O3 <sup>5</sup>  | 116.72(7) |
| O4 <sup>5</sup>  | Dy4 | O3 <sup>5</sup>  | 50.37(7)  |
| O15              | Dy4 | O3 <sup>5</sup>  | 112.01(8) |
| O19 <sup>2</sup> | Dy4 | O3 <sup>5</sup>  | 161.83(7) |
| O20 <sup>2</sup> | Dy4 | O3 <sup>5</sup>  | 112.16(7) |
| Dy1              | O25 | Dy2              | 122.04(9) |

<sup>1</sup>+X,3/2-Y,1/2+Z; <sup>2</sup>+X,1/2-Y,1/2+Z; <sup>3</sup>+X,1/2-Y,-1/2+Z; <sup>4</sup>+X,3/2-Y,-1/2+Z; <sup>5</sup>+X,+Y,-1+Z; <sup>6</sup>+X,+Y,1+Z

Table S4 Bond Angles for **2**.

| Atom             | Atom | Atom             | Angle/°    |
|------------------|------|------------------|------------|
| O2               | Dy1  | O6 <sup>1</sup>  | 82.5(2)    |
| O2               | Dy1  | O4 <sup>2</sup>  | 81.47(18)  |
| O6 <sup>1</sup>  | Dy1  | O4 <sup>2</sup>  | 136.30(17) |
| O2               | Dy1  | O9               | 117.89(18) |
| O6 <sup>1</sup>  | Dy1  | O9               | 77.29(18)  |
| O4 <sup>2</sup>  | Dy1  | O9               | 74.96(18)  |
| O2               | Dy1  | O12 <sup>3</sup> | 162.43(16) |
| O6 <sup>1</sup>  | Dy1  | O12 <sup>3</sup> | 97.16(17)  |
| O4 <sup>2</sup>  | Dy1  | O12 <sup>3</sup> | 109.64(15) |
| O9               | Dy1  | O12 <sup>3</sup> | 78.87(15)  |
| O2               | Dy1  | O8 <sup>4</sup>  | 80.10(18)  |
| O6 <sup>1</sup>  | Dy1  | O8 <sup>4</sup>  | 74.22(19)  |
| O4 <sup>2</sup>  | Dy1  | O8 <sup>4</sup>  | 141.1(2)   |
| O9               | Dy1  | O8 <sup>4</sup>  | 143.76(18) |
| O12 <sup>3</sup> | Dy1  | O8 <sup>4</sup>  | 82.90(16)  |
| O2               | Dy1  | O13              | 90.8(3)    |
| O6 <sup>1</sup>  | Dy1  | O13              | 147.6(2)   |
| O4 <sup>2</sup>  | Dy1  | O13              | 72.9(2)    |
| O9               | Dy1  | O13              | 132.5(2)   |
| O12 <sup>3</sup> | Dy1  | O13              | 80.1(2)    |
| O8 <sup>4</sup>  | Dy1  | O13              | 73.4(2)    |
| O5               | Dy2  | O10              | 155.22(18) |
| O5               | Dy2  | O3 <sup>2</sup>  | 82.13(19)  |
| O10              | Dy2  | O3 <sup>2</sup>  | 78.93(19)  |
| O5               | Dy2  | O1               | 86.2(2)    |
| O10              | Dy2  | O1               | 105.91(18) |
| O3 <sup>2</sup>  | Dy2  | O1               | 80.0(2)    |
| O5               | Dy2  | O7 <sup>5</sup>  | 92.00(19)  |
| O10              | Dy2  | O7 <sup>5</sup>  | 89.08(17)  |
| O3 <sup>2</sup>  | Dy2  | O7 <sup>5</sup>  | 132.3(2)   |
| O1               | Dy2  | O7 <sup>5</sup>  | 147.10(19) |
| O5               | Dy2  | O11 <sup>4</sup> | 125.97(17) |
| O10              | Dy2  | O11 <sup>4</sup> | 78.50(16)  |
| O3 <sup>2</sup>  | Dy2  | O11 <sup>4</sup> | 140.63(17) |
| O1               | Dy2  | O11 <sup>4</sup> | 75.75(19)  |
| O7 <sup>5</sup>  | Dy2  | O11 <sup>4</sup> | 78.94(19)  |
| O5               | Dy2  | O14              | 76.3(3)    |

|                  |     |                  |            |
|------------------|-----|------------------|------------|
| O10              | Dy2 | O14              | 81.5(3)    |
| O3 <sup>2</sup>  | Dy2 | O14              | 66.6(3)    |
| O1               | Dy2 | O14              | 143.9(3)   |
| O7 <sup>5</sup>  | Dy2 | O14              | 66.1(3)    |
| O11 <sup>4</sup> | Dy2 | O14              | 139.7(3)   |
| O5               | Dy2 | O12 <sup>4</sup> | 74.94(16)  |
| O10              | Dy2 | O12 <sup>4</sup> | 128.93(15) |
| O3 <sup>2</sup>  | Dy2 | O12 <sup>4</sup> | 145.35(18) |
| O1               | Dy2 | O12 <sup>4</sup> | 72.96(15)  |
| O7 <sup>5</sup>  | Dy2 | O12 <sup>4</sup> | 74.86(16)  |
| O11 <sup>4</sup> | Dy2 | O12 <sup>4</sup> | 51.17(13)  |
| O14              | Dy2 | O12 <sup>4</sup> | 129.9(3)   |

<sup>1</sup>3/2-X,-1/2+Y,3/2-Z; <sup>2</sup>-1/2+X,1/2-Y,-1/2+Z; <sup>3</sup>1-X,-Y,1-Z; <sup>4</sup>1/2+X,1/2-Y,1/2+Z; <sup>5</sup>1-X,1-Y,1-Z; <sup>6</sup>3/2-X,1/2+Y,3/2-Z

Table S5 Dy<sup>III</sup> ion geometry analysis by SHAPE 2.1 software.

| Configuration                                            | ABOXIY 1 |        |
|----------------------------------------------------------|----------|--------|
|                                                          | Dy1      | Dy3    |
| Heptagon ( $D_{7h}$ )                                    | 29.645   | 34.850 |
| Hexagonal pyramid ( $C_{6v}$ )                           | 19.365   | 19.358 |
| Pentagonal bipyramid ( $D_{5h}$ )                        | 5.861    | 7.086  |
| Capped octahedron ( $C_{3v}$ )                           | 2.294    | 0.532  |
| Capped trigonal prism ( $C_{2v}$ )                       | 0.548    | 1.021  |
| Johnson pentagonal bipyramid J13 ( $D_{5h}$ )            | 8.999    | 10.302 |
| Johnson elongated triangular pyramid J7 J26 ( $C_{3v}$ ) | 18.042   | 18.781 |
| Configuration                                            | ABOXIY 1 |        |
|                                                          | Dy2      | Dy4    |
| Octagon ( $D_{8h}$ )                                     | 29.397   | 33.269 |
| Heptagonal pyramid ( $C_{7v}$ )                          | 23.761   | 24.062 |
| Hexagonal bipyramid ( $D_{6h}$ )                         | 15.522   | 7.138  |
| Cube ( $O_h$ )                                           | 9.681    | 3.444  |
| Square antiprism ( $D_{4d}$ )                            | 2.400    | 6.490  |
| Triangular dodecahedron ( $D_{2d}$ )                     | 1.424    | 5.414  |
| Johnson gyrobifastigium J26 ( $D_{2d}$ )                 | 13.475   | 11.242 |
| Johnson elongated triangular bipyramid J14 ( $D_{3h}$ )  | 25.803   | 21.051 |
| Biaugmented trigonal prism J50 ( $C_{2v}$ )              | 1.320    | 7.182  |
| Biaugmented trigonal prism ( $C_{2v}$ )                  | 1.784    | 6.776  |
| Snub diphonoid J84 ( $D_{2d}$ )                          | 2.609    | 9.814  |

|                                                             |                 |        |
|-------------------------------------------------------------|-----------------|--------|
| Triakis tetrahedron ( $T_d$ )                               | 9.733           | 3.857  |
| Elongated trigonal bipyramid ( $D_{3h}$ )                   | 22.491          | 19.808 |
| Configuration                                               | <b>ABOXIY 2</b> |        |
|                                                             | <b>Dy1</b>      |        |
| Heptagon ( $D_{7h}$ )                                       | 33.499          |        |
| Hexagonal pyramid ( $C_{6v}$ )                              | 21.280          |        |
| Pentagonal bipyramid ( $D_{5h}$ )                           | 3.342           |        |
| Capped octahedron ( $C_{3v}$ )                              | 2.039           |        |
| Capped trigonal prism ( $C_{2v}$ )                          | 1.002           |        |
| Johnson pentagonal bipyramid J13 ( $D_{5h}$ )               | 6.686           |        |
| Johnson elongated triangular pyramid J7 J26<br>( $C_{3v}$ ) | 20.871          |        |
| Configuration                                               | <b>ABOXIY</b>   |        |
|                                                             | <b>2</b>        |        |
| Configuration                                               | <b>Dy2</b>      |        |
|                                                             |                 |        |
| Octagon ( $D_{8h}$ )                                        | 29.047          |        |
| Heptagonal pyramid ( $C_{7v}$ )                             | 23.859          |        |
| Hexagonal bipyramid ( $D_{6h}$ )                            | 13.113          |        |
| Cube ( $O_h$ )                                              | 10.968          |        |
| Square antiprism ( $D_{4d}$ )                               | 3.248           |        |
| Triangular dodecahedron ( $D_{2d}$ )                        | 2.243           |        |
| Johnson gyrobifastigium J26 ( $D_{2d}$ )                    | 10.315          |        |
| Johnson elongated triangular bipyramid J14<br>( $D_{3h}$ )  | 26.437          |        |
| Biaugmented trigonal prism J50 ( $C_{2v}$ )                 | 2.133           |        |
| Biaugmented trigonal prism ( $C_{2v}$ )                     | 2.310           |        |
| Snub diphenoid J84 ( $D_{2d}$ )                             | 2.403           |        |
| Triakis tetrahedron ( $T_d$ )                               | 11.350          |        |
| Elongated trigonal bipyramid ( $D_{3h}$ )                   | 23.695          |        |

-----  
S H A P E v2.1 Continuous Shape Measures calculation  
(c) 2013 Electronic Structure Group, Universitat de Barcelona  
Contact: llunell@ub.edu  
-----

#### 1-Dy1 structures

|         |       |                                  |
|---------|-------|----------------------------------|
| HP-7    | 1 D7h | Heptagon                         |
| HPY-7   | 2 C6v | Hexagonal pyramid                |
| PBPY-7  | 3 D5h | Pentagonal bipyramid             |
| COC-7   | 4 C3v | Capped octahedron                |
| CTPR-7  | 5 C2v | Capped trigonal prism            |
| JPBPY-7 | 6 D5h | Johnson pentagonal bipyramid J13 |



JETPY-7            7 C3v    Johnson elongated triangular pyramid J7

| Structure [ML7] | HP-7    | HPY-7   | PBPY-7  | COC-7  |
|-----------------|---------|---------|---------|--------|
| CTPR-7          | JPBPY-7 | JETPY-7 |         |        |
| ABOXIY          | ,       | 29.645, | 19.365, | 5.861, |
| 0.548,          | 8.999,  | 18.042  |         | 2.294, |

-----  
S H A P E    v2.1            Continuous Shape Measures calculation  
(c) 2013    Electronic Structure Group, Universitat de Barcelona  
            Contact:    llunell@ub.edu

-----  
**1-Dy2** structures

|                 |        |                                            |          |         |        |
|-----------------|--------|--------------------------------------------|----------|---------|--------|
| OP-8            | 1 D8h  | Octagon                                    |          |         |        |
| HPY-8           | 2 C7v  | Heptagonal pyramid                         |          |         |        |
| HBPY-8          | 3 D6h  | Hexagonal bipyramid                        |          |         |        |
| CU-8            | 4 Oh   | Cube                                       |          |         |        |
| SAPR-8          | 5 D4d  | Square antiprism                           |          |         |        |
| TDD-8           | 6 D2d  | Triangular dodecahedron                    |          |         |        |
| JGBF-8          | 7 D2d  | Johnson gyrobifastigium J26                |          |         |        |
| JETBPY-8        | 8 D3h  | Johnson elongated triangular bipyramid J14 |          |         |        |
| JBTPR-8         | 9 C2v  | Biaugmented trigonal prism J50             |          |         |        |
| BTPR-8          | 10 C2v | Biaugmented trigonal prism                 |          |         |        |
| JSD-8           | 11 D2d | Snub diphenoid J84                         |          |         |        |
| TT-8            | 12 Td  | Triakis tetrahedron                        |          |         |        |
| ETBPY-8         | 13 D3h | Elongated trigonal bipyramid               |          |         |        |
| Structure [ML8] | OP-8   | HPY-8                                      | HBPY-8   | CU-8    |        |
| SAPR-8          | TDD-8  | JGBF-8                                     | JETBPY-8 | JBTPR-8 |        |
| BTPR-8          | JSD-8  | TT-8                                       | ETBPY-8  |         |        |
| ABOXIY          | ,      | 29.397,                                    | 23.761,  | 15.522, | 9.681, |
| 2.400,          | 1.424, | 13.475,                                    | 25.803,  | 1.320,  | 1.784, |
| 2.609,          | 9.733, | 22.491                                     |          |         |        |

-----  
S H A P E    v2.1            Continuous Shape Measures calculation  
(c) 2013    Electronic Structure Group, Universitat de Barcelona  
            Contact:    llunell@ub.edu

-----  
**1-Dy3** structures

|         |       |                                         |  |  |
|---------|-------|-----------------------------------------|--|--|
| HP-7    | 1 D7h | Heptagon                                |  |  |
| HPY-7   | 2 C6v | Hexagonal pyramid                       |  |  |
| PBPY-7  | 3 D5h | Pentagonal bipyramid                    |  |  |
| COC-7   | 4 C3v | Capped octahedron                       |  |  |
| CTPR-7  | 5 C2v | Capped trigonal prism                   |  |  |
| JPBPY-7 | 6 D5h | Johnson pentagonal bipyramid J13        |  |  |
| JETPY-7 | 7 C3v | Johnson elongated triangular pyramid J7 |  |  |

|                 |         |         |         |        |        |
|-----------------|---------|---------|---------|--------|--------|
| Structure [ML7] |         | HP-7    | HPY-7   | PBPY-7 | COC-7  |
| CTPR-7          | JPBPY-7 | JETPY-7 |         |        |        |
| ABOXIY          | ,       | 34.850, | 19.358, | 7.086, | 0.532, |
| 1.021,          | 10.302, | 18.781  |         |        |        |

-----

S H A P E v2.1 Continuous Shape Measures calculation  
(c) 2013 Electronic Structure Group, Universitat de Barcelona  
Contact: llunell@ub.edu

-----

**1-Dy4** structures

|          |        |                                            |
|----------|--------|--------------------------------------------|
| OP-8     | 1 D8h  | Octagon                                    |
| HPY-8    | 2 C7v  | Heptagonal pyramid                         |
| HBPY-8   | 3 D6h  | Hexagonal bipyramid                        |
| CU-8     | 4 Oh   | Cube                                       |
| SAPR-8   | 5 D4d  | Square antiprism                           |
| TDD-8    | 6 D2d  | Triangular dodecahedron                    |
| JGBF-8   | 7 D2d  | Johnson gyrobifastigium J26                |
| JETBPY-8 | 8 D3h  | Johnson elongated triangular bipyramid J14 |
| JBTPR-8  | 9 C2v  | Biaugmented trigonal prism J50             |
| BTPR-8   | 10 C2v | Biaugmented trigonal prism                 |
| JSD-8    | 11 D2d | Snub diphenoid J84                         |
| TT-8     | 12 Td  | Triakis tetrahedron                        |
| ETBPY-8  | 13 D3h | Elongated trigonal bipyramid               |

|                 |        |         |          |        |         |
|-----------------|--------|---------|----------|--------|---------|
| Structure [ML8] |        | OP-8    | HPY-8    | HBPY-8 | CU-8    |
| SAPR-8          | TDD-8  | JGBF-8  | JETBPY-8 |        | JBTPR-8 |
| BTPR-8          | JSD-8  | TT-8    | ETBPY-8  |        |         |
| ABOXIY          | ,      | 33.269, | 24.062,  | 7.138, | 3.444,  |
| 6.490,          | 5.414, | 11.242, | 21.051,  | 7.182, | 6.776,  |
| 9.814,          | 3.857, | 19.808  |          |        |         |

-----

S H A P E v2.1 Continuous Shape Measures calculation  
(c) 2013 Electronic Structure Group, Universitat de Barcelona  
Contact: llunell@ub.edu

-----

**2-Dy1** structures

|         |       |                                         |
|---------|-------|-----------------------------------------|
| HP-7    | 1 D7h | Heptagon                                |
| HPY-7   | 2 C6v | Hexagonal pyramid                       |
| PBPY-7  | 3 D5h | Pentagonal bipyramid                    |
| COC-7   | 4 C3v | Capped octahedron                       |
| CTPR-7  | 5 C2v | Capped trigonal prism                   |
| JPBPY-7 | 6 D5h | Johnson pentagonal bipyramid J13        |
| JETPY-7 | 7 C3v | Johnson elongated triangular pyramid J7 |

|                  |         |         |       |        |       |
|------------------|---------|---------|-------|--------|-------|
| Structure [ML7 ] |         | HP-7    | HPY-7 | PBPY-7 | COC-7 |
| CTPR-7           | JPBPY-7 | JETPY-7 |       |        |       |

ABOXIY , 33.499, 21.280, 3.342, 2.039,  
 1.002, 6.686, 20.871

-----  
 S H A P E v2.1 Continuous Shape Measures calculation  
 (c) 2013 Electronic Structure Group, Universitat de Barcelona  
 Contact: llunell@ub.edu  
 -----

**2-Dy2** structures

|                  |         |                                            |          |         |         |      |
|------------------|---------|--------------------------------------------|----------|---------|---------|------|
| OP-8             | 1 D8h   | Octagon                                    |          |         |         |      |
| HPY-8            | 2 C7v   | Heptagonal pyramid                         |          |         |         |      |
| HBPY-8           | 3 D6h   | Hexagonal bipyramid                        |          |         |         |      |
| CU-8             | 4 Oh    | Cube                                       |          |         |         |      |
| SAPR-8           | 5 D4d   | Square antiprism                           |          |         |         |      |
| TDD-8            | 6 D2d   | Triangular dodecahedron                    |          |         |         |      |
| JGBF-8           | 7 D2d   | Johnson gyrobifastigium J26                |          |         |         |      |
| JETBPY-8         | 8 D3h   | Johnson elongated triangular bipyramid J14 |          |         |         |      |
| JBTPR-8          | 9 C2v   | Biaugmented trigonal prism J50             |          |         |         |      |
| BTPR-8           | 10 C2v  | Biaugmented trigonal prism                 |          |         |         |      |
| JSD-8            | 11 D2d  | Snub diphenoïd J84                         |          |         |         |      |
| TT-8             | 12 Td   | Triakis tetrahedron                        |          |         |         |      |
| ETBPY-8          | 13 D3h  | Elongated trigonal bipyramid               |          |         |         |      |
| Structure [ML8 ] |         |                                            | OP-8     | HPY-8   | HBPY-8  | CU-8 |
| SAPR-8           | TDD-8   | JGBF-8                                     | JETBPY-8 | JBTPR-8 |         |      |
| BTPR-8           | JSD-8   | TT-8                                       | ETBPY-8  |         |         |      |
| ABOXIY           | ,       | 29.047,                                    | 23.859,  | 13.113, | 10.968, |      |
| 3.248,           | 2.243,  | 10.315,                                    | 26.437,  | 2.133,  | 2.310,  |      |
| 2.403,           | 11.350, | 23.695                                     |          |         |         |      |

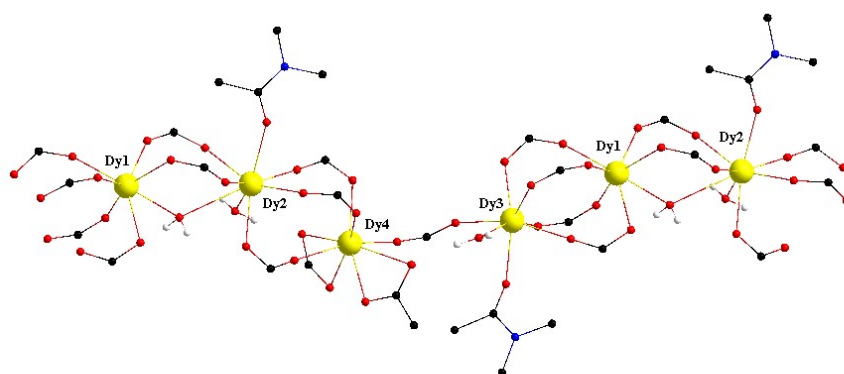

Figure S1. The connection modes between metal ions in compound **1**. Hydrogen, H; blue, N; yellow, Dy; red, O; Black, C.

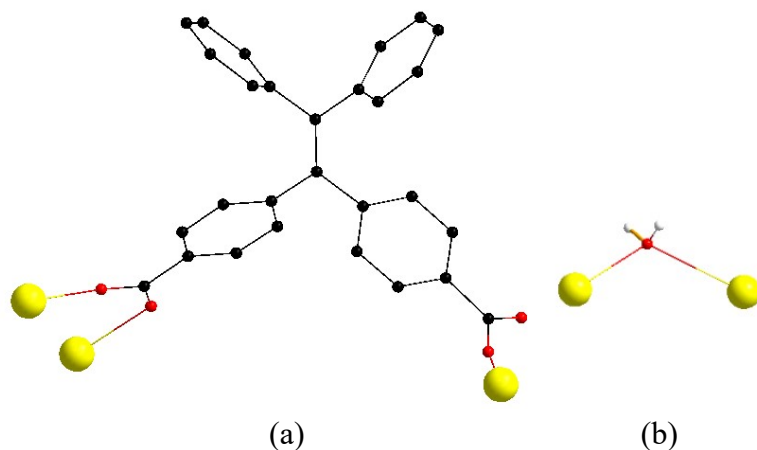

Figure S2. The coordination modes of ligand and water molecule in compound **1**. Hydrogen, H; yellow, Dy; red, O; Black, C.

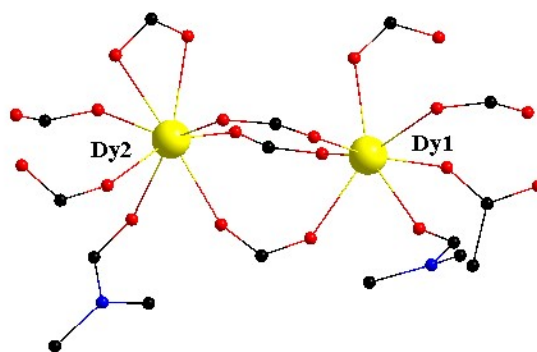

Figure S3. The connection modes between metal ions in compound **2**. Blue, N; yellow, Dy; red, O; Black, C.

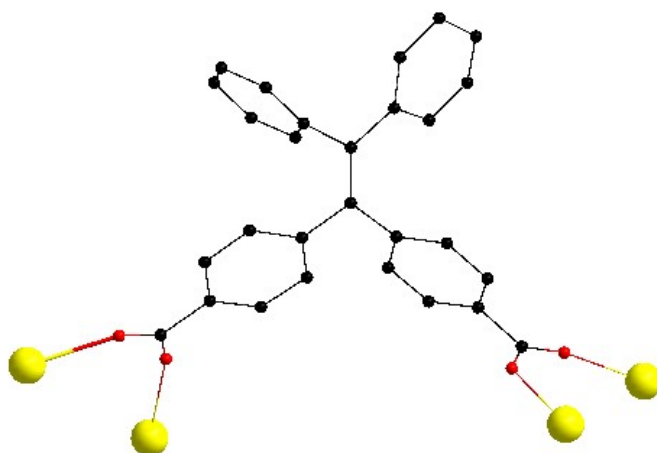

Figure S4. The connection modes between metal ions in compound **2**. Yellow, Dy; red, O; Black, C.

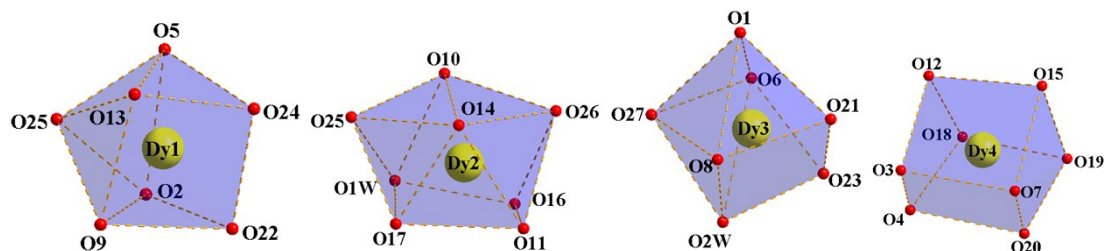

Figure S5. Local coordination geometries of the  $\text{Dy}^{3+}$  ions for **1**. Yellow, Dy; red, O.

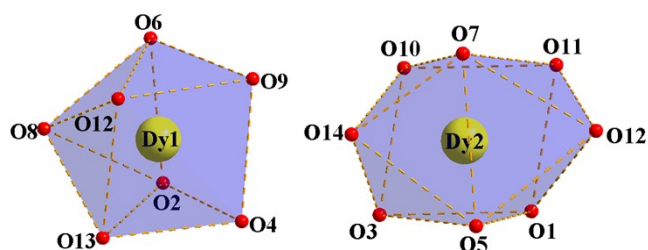

Figure S6. Local coordination geometries of the  $\text{Dy}^{3+}$  ions for **2**. Yellow, Dy; red, O.

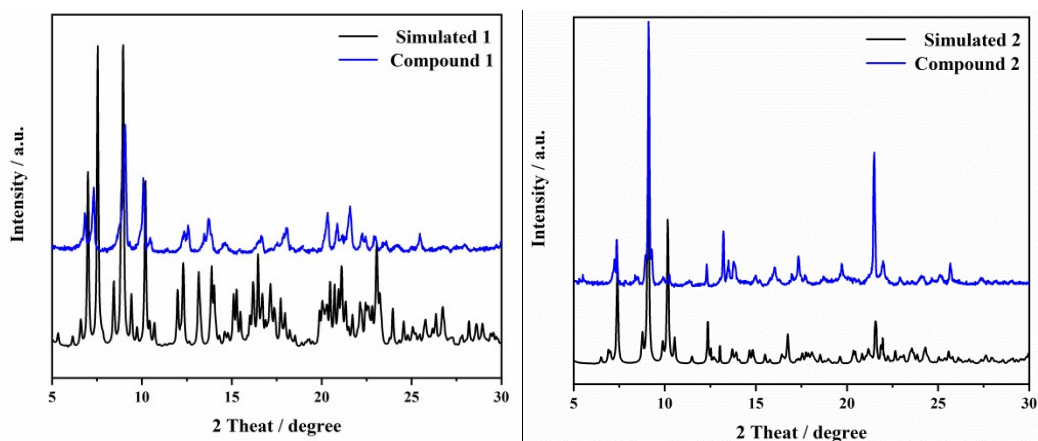

(a)

(b)

Figure S7. PXRD curves of **1** (a) and **2** (b).

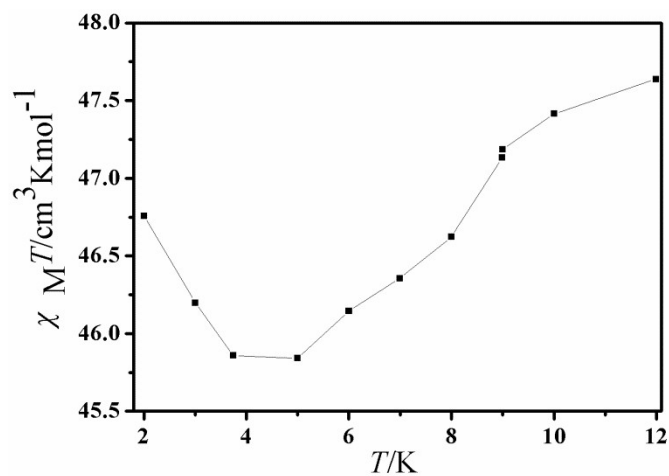

Figure S8. Temperature dependence of  $\chi_M T$  measured at 1 KOe for **1**, respectively.

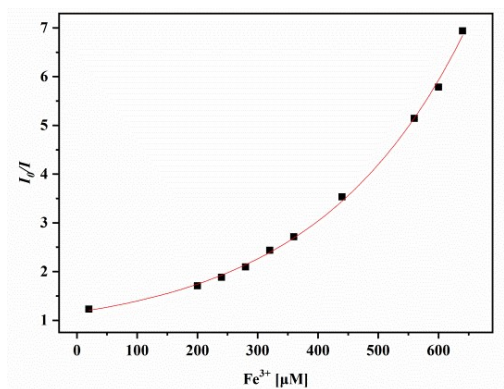

(a)

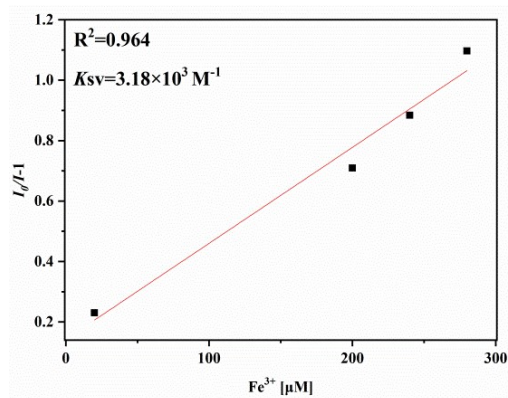

(b)

Figure S9. (a) The SV spectrum of  $\text{Fe}^{3+}$  for compound **1**; (b) Stern-Volmer fitting curve for compound **1**.

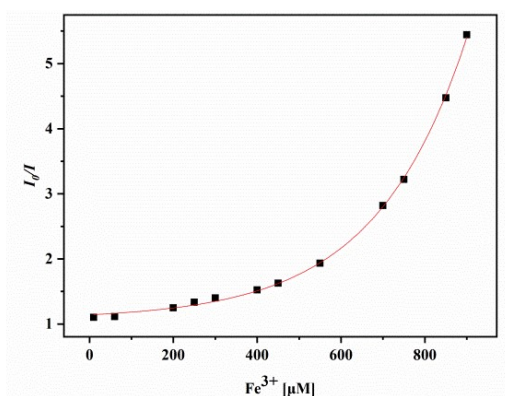

(a)

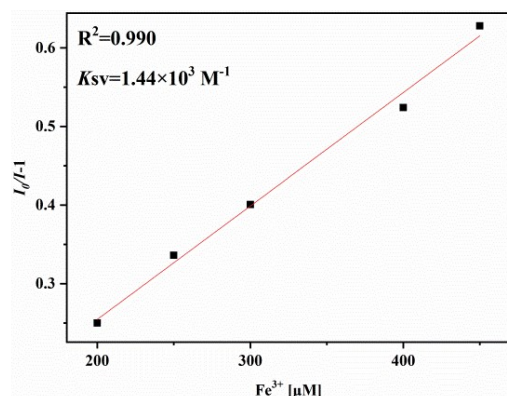

(b)

Figure S10. (a) The SV spectrum of  $\text{Fe}^{\text{III}}$  for compound **2** (a); (b) Stern-Volmer fitting curve for compound **2**.

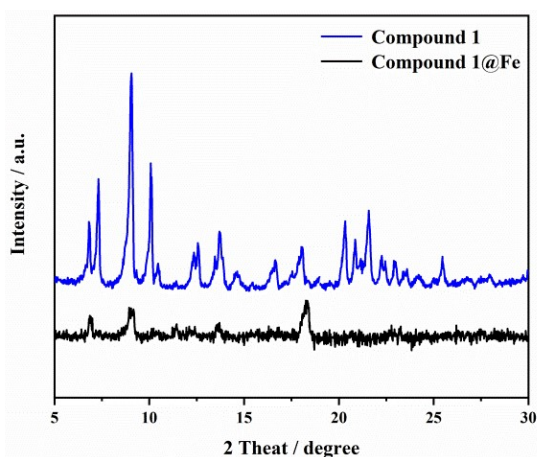

(a)

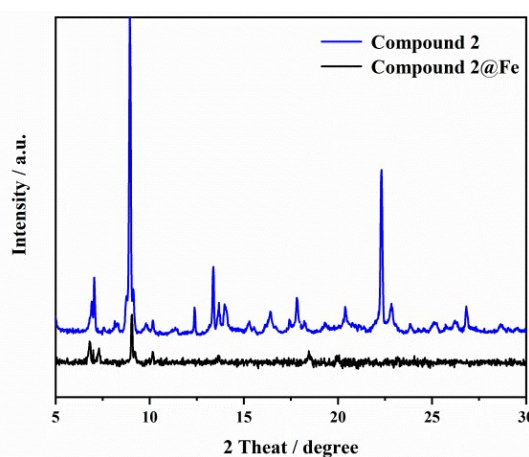

(b)

Figure S11. The PXRD patterns for compounds **1** (a) and **2** (b) after fluorescent detection.



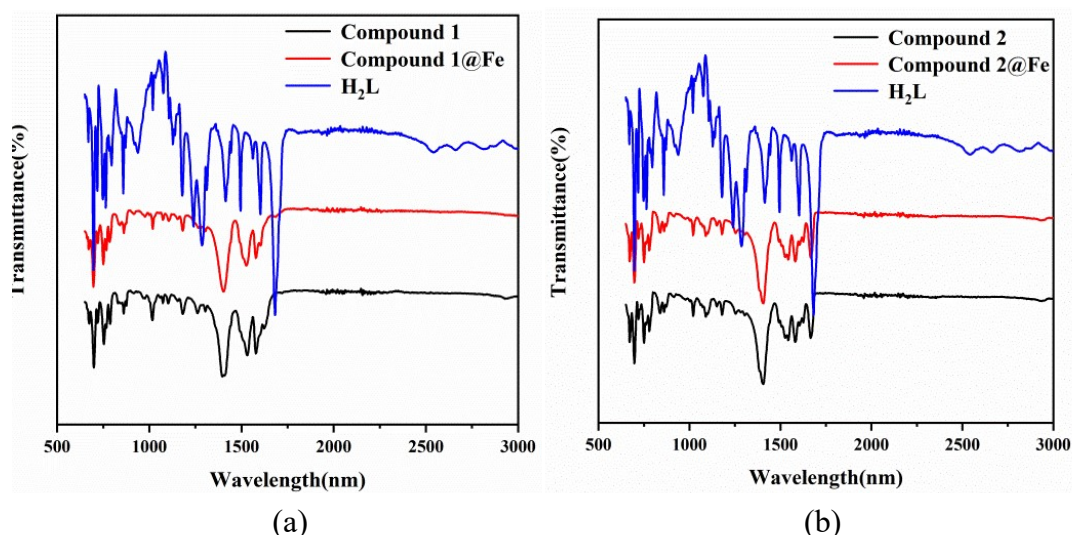

Figure S12. The FT-IR patterns for compounds **1** (a) and **2** (b) after fluorescent detection.

### Computational details

Multiconfigurational *ab initio* calculations, including spin-orbit coupling (SOC), were performed on selected systems. This type of calculation includes two steps:<sup>[1]</sup> 1) a set of spin eigenstates, are obtained by the state-averaged (SA) CASSCF method;<sup>[2]</sup> 2) the Kramers doublets (KDs) are obtained by state interaction which is the diagonalization of the SOC matrix in the space spanned by the spin eigenstates from the first step. In the CASSCF step, the active space consisted of 9 electrons in 7 orbitals and all the spin eigenstates of 21 sextets were included. The scalar relativistic effect is accounted via DKH2 Hamiltonian. The second step was performed via the RASSI-SO module<sup>[3]</sup> with the SOC integrals from the AMFI method.<sup>[4]</sup> The ANO-RCC type basis set,<sup>[5,6]</sup> including VTZP for Dy, VDZ for C and H as well as VDZP for other atoms, was used. All the calculations were carried out with the MOLCAS@UU, a freely academic version of MOLCAS 8.0 code.<sup>[7]</sup> The SINGLE ANISO module<sup>[8,9]</sup> was used to obtain the g-tensors.

Table S6 Calculated energy levels ( $\text{cm}^{-1}$ ),  $\mathbf{g}$  ( $g_x, g_y, g_z$ ) tensors of the lowest eight KDs of individual  $\text{Dy}^{\text{III}}$  fragments of compounds **1** and **2** using CASSCF/RASSI-SO with MOLCAS 8.2.

| Compound 1     |                 |                 |                 |                 |                 |                 |                 |                 |
|----------------|-----------------|-----------------|-----------------|-----------------|-----------------|-----------------|-----------------|-----------------|
| Str1_modelA    | KD <sub>0</sub> | KD <sub>1</sub> | KD <sub>2</sub> | KD <sub>3</sub> | KD <sub>4</sub> | KD <sub>5</sub> | KD <sub>6</sub> | KD <sub>7</sub> |
| g <sub>x</sub> | 1.017E-01       | 8.020E+00       | 1.782E+00       | 3.384E-01       | 1.662E+00       | 5.322E-01       | 1.037E-01       | 1.621E-02       |

|                       |           |           |           |           |           |           |           |           |
|-----------------------|-----------|-----------|-----------|-----------|-----------|-----------|-----------|-----------|
| gy                    | 2.097E-01 | 2.605E+00 | 2.820E+00 | 2.719E+00 | 2.325E+00 | 7.919E-01 | 2.244E-01 | 1.133E-01 |
| gz                    | 1.955E+01 | 1.080E+01 | 1.090E+01 | 1.345E+01 | 1.386E+01 | 1.759E+01 | 1.941E+01 | 1.961E+01 |
| E (cm <sup>-1</sup> ) | 0.000E+00 | 1.660E+02 | 2.090E+02 | 2.476E+02 | 2.856E+02 | 3.443E+02 | 4.344E+02 | 4.971E+02 |
| <b>Str1_modelB</b>    | KD0       | KD1       | KD2       | KD3       | KD4       | KD5       | KD6       | KD7       |
| gx                    | 1.607E-02 | 4.817E-01 | 8.596E-01 | 5.715E+00 | 2.253E+00 | 1.705E+00 | 1.744E-01 | 3.909E-02 |
| gy                    | 2.456E-02 | 1.235E+00 | 1.668E+00 | 9.418E-01 | 3.739E+00 | 2.367E+00 | 2.256E-01 | 8.968E-02 |
| gz                    | 1.964E+01 | 1.829E+01 | 1.402E+01 | 1.016E+01 | 1.045E+01 | 1.241E+01 | 1.747E+01 | 1.932E+01 |
| E (cm <sup>-1</sup> ) | 0.000E+00 | 7.620E+01 | 1.100E+02 | 1.456E+02 | 1.695E+02 | 2.227E+02 | 3.639E+02 | 4.719E+02 |
| <b>Str1_modelC</b>    | KD0       | KD1       | KD2       | KD3       | KD4       | KD5       | KD6       | KD7       |
| gx                    | 2.510E-01 | 5.230E-01 | 1.340E+00 | 6.998E+00 | 4.116E-01 | 5.117E-01 | 5.197E-02 | 1.969E-01 |
| gy                    | 7.958E-01 | 1.316E+00 | 2.931E+00 | 2.498E+00 | 4.122E+00 | 3.810E+00 | 1.116E+00 | 7.561E-01 |
| gz                    | 1.810E+01 | 1.549E+01 | 1.280E+01 | 8.273E+00 | 1.046E+01 | 1.467E+01 | 1.818E+01 | 1.872E+01 |
| E (cm <sup>-1</sup> ) | 0.000E+00 | 3.876E+01 | 9.869E+01 | 1.751E+02 | 2.423E+02 | 2.973E+02 | 3.478E+02 | 3.730E+02 |
| <b>Str1_modelD</b>    | KD0       | KD1       | KD2       | KD3       | KD4       | KD5       | KD6       | KD7       |
| gx                    | 5.741E-01 | 6.027E-01 | 1.500E+00 | 4.020E+00 | 9.448E-02 | 2.338E+00 | 2.244E+00 | 4.424E-01 |
| gy                    | 1.526E+00 | 1.866E+00 | 3.662E+00 | 5.848E+00 | 5.499E-01 | 3.626E+00 | 3.692E+00 | 1.210E+00 |
| gz                    | 1.800E+01 | 1.344E+01 | 1.145E+01 | 1.107E+01 | 1.386E+01 | 1.173E+01 | 1.193E+01 | 1.658E+01 |
| E (cm <sup>-1</sup> ) | 0.000E+00 | 4.675E+01 | 8.242E+01 | 1.523E+02 | 2.379E+02 | 3.179E+02 | 3.761E+02 | 4.414E+02 |
|                       |           |           |           |           |           |           |           |           |
| <b>Str2_modelA</b>    | KD0       | KD1       | KD2       | KD3       | KD4       | KD5       | KD6       | KD7       |
| gx                    | 2.642E-01 | 1.717E-01 | 1.852E+00 | 2.417E+00 | 2.613E+00 | 1.745E-01 | 4.092E-02 | 3.550E-02 |
| gy                    | 4.375E-01 | 3.367E-01 | 2.425E+00 | 5.443E+00 | 3.909E+00 | 3.353E-01 | 2.018E-01 | 9.605E-02 |
| gz                    | 1.884E+01 | 1.899E+01 | 1.378E+01 | 1.073E+01 | 1.263E+01 | 1.913E+01 | 1.734E+01 | 1.890E+01 |
| E (cm <sup>-1</sup> ) | 0.000E+00 | 4.284E+01 | 9.527E+01 | 1.674E+02 | 2.052E+02 | 2.987E+02 | 3.618E+02 | 4.189E+02 |
| <b>Str2_modelB</b>    | KD0       | KD1       | KD2       | KD3       | KD4       | KD5       | KD6       | KD7       |
| gx                    | 7.053E-03 | 6.621E-02 | 2.889E+00 | 7.547E+00 | 1.751E+00 | 2.605E+00 | 8.743E-02 | 1.684E-01 |
| gy                    | 1.847E-01 | 2.624E-01 | 3.384E+00 | 2.579E+00 | 4.071E+00 | 4.490E+00 | 6.160E-01 | 7.059E-01 |
| gz                    | 1.907E+01 | 1.894E+01 | 1.368E+01 | 8.176E+00 | 9.834E+00 | 1.347E+01 | 1.622E+01 | 1.823E+01 |
| E (cm <sup>-1</sup> ) | 0.000E+00 | 2.147E+01 | 9.395E+01 | 1.369E+02 | 2.032E+02 | 2.483E+02 | 3.150E+02 | 3.566E+02 |

Table S7 Standard deviation ( $\sigma$ ) calculation for the detection of Fe<sup>3+</sup> for compound 1.

| Test               | fluorescence intensity (a.u.) |
|--------------------|-------------------------------|
| 1                  | 141141                        |
| 2                  | 141253                        |
| 3                  | 141094                        |
| average            | 141163                        |
| standard deviation | 81.68                         |

Table S8 Standard deviation ( $\sigma$ ) calculation for the detection of Fe<sup>3+</sup> for compound 2.

| Test | fluorescence intensity (a.u.) |
|------|-------------------------------|
| 1    | 67059                         |



|                    |       |
|--------------------|-------|
| 2                  | 67141 |
| 3                  | 67097 |
| average            | 67099 |
| standard deviation | 41.03 |

Table S9 Comparison of inductive capability of Fe<sup>3+</sup> for compounds **1**, **2** and other luminescence MOFs

| Materials                                                                                                                                   | K <sub>SV</sub> (M <sup>-1</sup> ) | Detection<br>limitation (ppb) | Solvent | Reference |
|---------------------------------------------------------------------------------------------------------------------------------------------|------------------------------------|-------------------------------|---------|-----------|
| Compound <b>1</b>                                                                                                                           | 3.18×10 <sup>3</sup>               | 4.51×10 <sup>6</sup>          | water   | This work |
| Compound <b>2</b>                                                                                                                           | 1.44 ×10 <sup>3</sup>              | 6.90×10 <sup>6</sup>          | water   | This work |
| [Zn <sub>2</sub> (4,4'-nba) <sub>2</sub> (1,4-bib) <sub>2</sub> ] <sub>n</sub>                                                              | 2.54×10 <sup>4</sup>               | 1.29×10 <sup>6</sup>          | water   | [10]      |
| [Zn(L) <sub>0.5</sub> (MIP)] <sub>n</sub>                                                                                                   | 6.50×10 <sup>3</sup>               | 2.20×10 <sup>5</sup>          | water   | [11]      |
| {[Zn <sub>2</sub> (L)(TBIP) <sub>1.5</sub> (OH)]·H <sub>2</sub> O} <sub>n</sub>                                                             | 1.13×10 <sup>4</sup>               | 1.30×10 <sup>5</sup>          | water   | [12]      |
| {[Zn <sub>3</sub> (bpg) <sub>1.5</sub> (azdc) <sub>3</sub> ](DMF) <sub>5.9</sub> (H <sub>2</sub> O) <sub>1.05</sub> ] <sub>n</sub>          | 4.70×10 <sup>4</sup>               | 1.00×10 <sup>6</sup>          | water   | [13]      |
| {[Zn <sub>3</sub> (mtrb) <sub>3</sub> (btc) <sub>2</sub> ] <sub>3</sub> H <sub>2</sub> O} <sub>n</sub>                                      | 3.19×10 <sup>4</sup>               | 2.00×10 <sup>5</sup>          | water   | [14]      |
| [Zn(L) <sub>0.5</sub> (MIP)] <sub>n</sub>                                                                                                   | 2.25×10 <sup>4</sup>               | 5.40×10 <sup>5</sup>          | water   | [14]      |
| Zn(L)(DBT) <sub>n</sub>                                                                                                                     | 1.29×10 <sup>4</sup>               | 6.50×10 <sup>5</sup>          | water   | [14]      |
| [Eu(L)(H <sub>2</sub> O) <sub>3</sub> ] <sub>n</sub>                                                                                        | 9.60×10 <sup>5</sup>               | 4.50×10 <sup>3</sup>          | DMF     | [15]      |
| TbDTTA[Tb(L)(H <sub>2</sub> O) <sub>3</sub> ] <sub>n</sub>                                                                                  | 8.39×10 <sup>4</sup>               | 1.79×10 <sup>6</sup>          | water   | [15]      |
| [Cd <sub>1.5</sub> (L) <sub>2</sub> (bpy)(NO <sub>3</sub> )]·2DMF·2H <sub>2</sub> O                                                         | 6.02×10 <sup>4</sup>               | 1.02×10 <sup>5</sup>          | DMF     | [15]      |
| [Eu <sub>0.5</sub> Tb <sub>0.5</sub> (L)(H <sub>2</sub> O) <sub>3</sub> ] <sub>n</sub>                                                      | 4.20×10 <sup>5</sup>               | 6.40×10 <sup>4</sup>          | DMF     | [15]      |
| [Zn(FDC) <sub>2</sub> (H <sub>2</sub> O) <sub>2</sub> ] <sub>n</sub>                                                                        | 3.93×10 <sup>4</sup>               | 9.00×10 <sup>5</sup>          | water   | [16]      |
| {[Cd(L)- (BPDC)]·2H <sub>2</sub> O} <sub>n</sub>                                                                                            | 1.68×10 <sup>4</sup>               | 1.76×10 <sup>6</sup>          | water   | [17]      |
| [Zn(L) <sub>2</sub> ] <sub>n</sub>                                                                                                          | 3.63×10 <sup>4</sup>               | 2.21×10 <sup>6</sup>          | water   | [18]      |
| {[Cd(L) (SDBA)](H <sub>2</sub> O)]·0.5H <sub>2</sub> O} <sub>n</sub>                                                                        | 3.59×10 <sup>4</sup>               | 7.14×10 <sup>6</sup>          | water   | [18]      |
| EuDTTA                                                                                                                                      | 3.63×10 <sup>4</sup>               | 4.14×10 <sup>6</sup>          | water   | [19]      |
| {[Zn <sub>4</sub> (μ <sub>3</sub> -OH) <sub>2</sub> (BTC) <sub>2</sub> (BBI4PY) <sub>2</sub> ] <sub>10</sub> H <sub>2</sub> O} <sub>n</sub> | 3.93×10 <sup>4</sup>               | 9.00×10 <sup>5</sup>          | water   | [20]      |
| [Zn <sub>2</sub> (L) <sub>2</sub> (TPA)]·2H <sub>2</sub> O                                                                                  | 6.40×10 <sup>3</sup>               | 3.84×10 <sup>6</sup>          | water   | [21]      |
| Eu <sub>0.24</sub> Tb <sub>0.76</sub> BIM-COOH-PLA                                                                                          | 1.27×10 <sup>4</sup>               | 4.47×10 <sup>6</sup>          | water   | [22]      |
| {[Eu <sub>2</sub> (ppda) <sub>2</sub> (npdc)(H <sub>2</sub> O)]H <sub>2</sub> O} <sub>n</sub>                                               | 1.64×10 <sup>5</sup>               | 1.66×10 <sup>7</sup>          | water   | [23]      |
| PAF-5CF                                                                                                                                     | 1.18×10 <sup>3</sup>               | 3.80×10 <sup>7</sup>          | ethanol | [24]      |
| {[Zn <sub>2</sub> (μ <sub>4</sub> -L)(μ <sub>3</sub> .bta)(3H <sub>2</sub> O)]H <sub>2</sub> O} <sub>n</sub>                                | 1.06×10 <sup>4</sup>               | 1.10×10 <sup>8</sup>          | water   | [25]      |
| 534-MOF-Tb                                                                                                                                  | 5.51×10 <sup>3</sup>               | 1.30×10 <sup>8</sup>          | water   | [26]      |
| [Zn(modbc) <sub>2</sub> ](Zn-CP)                                                                                                            | 7.20×10 <sup>3</sup>               | 5.70×10 <sup>8</sup>          | water   | [27]      |

## References

- [1] J. Luzón and R. Sessoli, Lanthanides in molecular magnetism: so fascinating, so challenging. *Dalton Trans.* 2012, **41**, 13556-13567.

- [2] B. O. Roos, P. R. Taylor and P. E. M. Siegbahn, A complete active space SCF method (CASSCF) using a density matrix formulated super-CI approach, *Chem. Phys.*, 1980, **48**, 157-173.
- [3] P. Malmqvist, B. O. Roos and B. Schimmelpfennig, The restricted active space (RAS) state interaction approach with spin-orbit coupling, *Chem. Phys. Lett.*, 2002, **357**, 230-240.
- [4] B. A. Hess, C. M. Marian, U. Wahlgren and O. Gropen, A mean-field spin-orbit method applicable to correlated wavefunctions, *Chem. Phys. Lett.*, 1996, **251**, 365-371.
- [5] B. O. Roos, R. Lindh, P. Malmqvist, V. Veryazov and P. Widmark, Main group atoms and dimers studied with a new relativistic ANO basis set, *J. Phys. Chem. A.*, 2004, **108**, 2851–2858.
- [6] B. O. Roos, R. Lindh, P. Malmqvist, V. Veryazov, P. Widmark and A. C. Borin, New relativistic atomic natural orbital basis sets for lanthanide atoms with applications to the Ce diatom and LuF<sub>3</sub>, *J. Phys. Chem. A.*, 2008, **112**, 11431–11435.
- [7] F. Aquilante, J. Autschbach, R. K. Carlson, L. F. Chibotaru, M. G. Delcey, L. De Vico, I. F. Galván, N. Ferré, L. M. Frutos, L. Gagliardi, M. Garavelli, A. Giussani, C. E. Hoyer, G. Li. Manni, H. Lischka, D. X. Ma, P. Malmqvist, T. Müller, A. Nenov, M. Olivucci, T. B. Pedersen, D. L. Peng, F. Plasser, B. Pritchard, M. Reiher, I. Rivalta, I. Schapiro, M. J. Segarra, M. Stenrup, D. G. Truhlar, L. Ungur, A. Valentini, S. Vancoillie, V. Veryazov, V. P. Vysotskiy, O. Weingart, F. Zapata and R. Lindh, Molcas 8: New capabilities for multiconfigurational quantum chemical calculations across the periodic table, *J. Comput. Chem.*, 2016, **37**, 506–541.
- [8] L. F. Chibotaru and L. Ungur, Ab initio calculation of anisotropic magnetic properties of complexes. I. Unique definition of pseudospin Hamiltonians and their derivation, *J. Chem. Phys.*, 2012, **137**, 064112.
- [9] L. F. Chibotaru, *Ab initio* methodology for pseudospin Hamiltonians of anisotropic magnetic complexes, *Adv. Chem. Phys.*, 2013, **153**, 397–519.
- [10] R. Goswami, S.C. Mandal, B. Pathak and S. Neogi, Guest-induced ultrasensitive detection of multiple toxic organics and Fe<sup>3+</sup> ions in a strategically designed and

regenerative smart fluorescent metal–organic framework, *ACS Appl. Mater. Interfaces.*, 2019, **11**, 9042-9053.

[11] Y. Q. Zhang, V. A. Blatov, T. R. Zheng, C. H. Yang, L. L. Qian, K. Li, B. L. Li and B. Wu, A luminescent zinc (II) coordination polymer with unusual (3, 4, 4)-coordinated self-catenated 3D network for selective detection of nitroaromatics and ferric and chromate ions: a versatile luminescent sensor, *Dalton Trans.*, 2018, **47**, 6189-6198.

[12] M. Singh, S. Senthilkumar, S. Rajput and S. Neogi, Pore-functionalized and hydrolytically robust Cd (II)-metal–organic framework for highly selective, multicyclic CO<sub>2</sub> adsorption and fast-responsive luminescent monitoring of Fe (III) and Cr (VI) ions with notable sensitivity and reusability, *Inorg. Chem.*, 2020, **59**, 3012-3025.

[13] Z. H. Wang, X. Z. Wang, X.Y. Lai, Q. Hou, J. X. Ma, J. H. Li, K. Yue and Q. F. Yang, Three new coordination polymers based on a fluorene derivative ligand for the highly luminescent sensitive detection of Fe<sup>3+</sup>, *J. Mol. Struct.*, 2020, **1202**, 127341-127350.

[14] H. Zhu, L. S. Fu, D. Liu, Y. H. Li and G. Y. Dong, Three water-stable luminescent Zn (II) coordination polymers for highly sensitive and selective sensing of acetylacetone and Fe<sup>3+</sup> ions, *J. Solid State Chem.*, 2020, **286**, 121265-121274.

[15] X. F. Cheng, J. S. Hu, J. X. Li, M and D. Zhang, Tunable emission and selective luminescence sensing for nitro-pollutants and metal ions based on bifunctional lanthanide metal-organic frameworks, *J. Lumin.*, 2020, **221**, 117100-117110.

[16] S. Khan, P. Das and S. K. Mandal, Design and construction of a luminescent and highly stable 3D metal–organic framework with a [Zn<sub>4</sub>(μ<sub>3</sub>-OH)<sub>2</sub>]<sup>6+</sup> core, *Inorg. Chem.*, 2020, **59**, 4588-4600.

[17] T. Y. Xu, J. M. Li, Y. H. Han, A. R. Wang, K. H. He and Z. F. Shi, A new 3D four-fold interpenetrated dia-like luminescent Zn (II)-based metal–organic framework: The sensitive detection of Fe<sup>3+</sup>, Cr<sub>2</sub>O<sub>7</sub><sup>2-</sup>, and CrO<sub>4</sub><sup>2-</sup> in water, and nitrobenzene in ethanol, *New J. Chem.*, 2020, **44**, 4011-4022.

[18] S. G. Chen, Z. Z. Shi, L. Qin, H. L. Jia, H and G. Zheng, Two new luminescent

Cd (II)-MOFs as bi-functional chemosensors for detection of cations  $\text{Fe}^{3+}$ , anions  $\text{CrO}_4^{2-}$  and  $\text{Cr}_2\text{O}_7^{2-}$  in aqueous solution, *Cryst. Growth Des.*, 2017, **17**, 67-72.

[19] Y. Zhang, L. Wu and M. Feng, Assembly of two-dimension LMOF materials with excellent detection of  $\text{Fe}^{3+}$  ion in water based on overlap mechanism, *J. Solid State Chem.*, 2020, **294**, 121868-121874.

[20] S. Khan, P. Das and S. K. Mandal, Design and construction of a luminescent and highly stable 3D metal–organic framework with a  $[\text{Zn}_4(\mu_3\text{-OH})_2]^{6+}$  core, *Inorg. Chem.*, 2020, **59**, 4588-4600.

[21] X. Y. Guo, Z. P. Dong, F. Zhao, Z. L. Liu and Y. Q. Wang, Zinc (II)–organic framework as a multi-responsive photoluminescence sensor for efficient and recyclable detection of pesticide 2, 6-dichloro-4-nitroaniline, Fe (III) and Cr (VI), *New J. Chem.*, 2019, **43**, 2353-2361.

[22] P. Jia, Z. H. Wang, Y. F. Zhang, D. Zhang, W. C. Gao, Y. Su, Y. B. Li and C. L. Yang, Selective sensing of  $\text{Fe}^{3+}$  ions in aqueous solution by a biodegradable platform based lanthanide metal organic framework, *Spectrochim. Acta A.*, 2020, **230**, 118084-118092.

[23] C. L. Li, F. Zhang, X. Li, G.W. Zhang and Y. Y. Yang, A luminescent Ln-MOF thin film for highly selective detection of nitroimidazoles in aqueous solutions based on inner filter effect, *J. Lumin.*, 2019, 205, 23-29.

[24] T. T. Ma, X. Zhao, Y. Matsuo, J. Song, R. Zhao, M. Faheem, M. Chen, Y. F. Zhang, Y. Y. Tian and G. S. Zhu, Fluorescein-based fluorescent porous aromatic framework for  $\text{Fe}^{3+}$  detection with high sensitivity, *J. Mater. Chem. C.*, 2019, **7**, 2327-2332.

[25] Y. X. Yang, S. Y. Xia, H. X. Zhang, H. H. Niu, W. J. Dong and X. X. Wu, *J. Solid State Chem.*, 2020, **284**, 121180.

[26] M. Chen, W. M. Xu, J.Y. Tian, H. Cui, J. X. Zhang, C. S. Liu and M. Du, A terbium (III) lanthanide–organic framework as a platform for a recyclable multi-responsive luminescent sensor, *J. Mater. Chem. C.*, 2017, **5**, 2015-2021.

[27] Y. D. Wu, D.Y. Liu, M. H. Lin and J. Qian, Zinc (ii)-based coordination polymer encapsulated  $\text{Tb}^{3+}$  as a multi-responsive luminescent sensor for  $\text{Ru}^{3+}$ ,  $\text{Fe}^{3+}$ ,  $\text{CrO}_4^{2-}$ ,

$\text{Cr}_2\text{O}_7^{2-}$  and  $\text{MnO}_4^-$ , *RSC Adv.*, 2020, **10**, 6022-6029.
